# Supplementary material
Source: Elsevier journal article supplement (https://www.sciencedirect.com/science/article/pii/S2531043722002598)
Supplement: mmc1 [file S2531043722002598:mmc1.docx]

Ms. Ref. No.: PULMOE-D-22-00347R1
Title: Severe exacerbations and mortality in COPD patients: a retrospective analysis of the database of the Hungarian National Health Insurance Fund
Pulmonology

Dear Dr Galffy,

The manuscript is improved but it is not yet acceptable for publication in its present form.

However, if you feel that you can suitably address the reviewers' comments (included below), I invite you to revise and resubmit your manuscript.

Please carefully address the issues raised in the comments.

If you are submitting a revised manuscript, please also:

a) Include a point by point reply of the reviewer comments
AND
b) File of the new version of the manuscript with the changes highlighted in yellow
AND
c) A clean (without corrections highlighted) version of the manuscript

Your revision is due by Nov 30, 2022.

To submit your revision, please do the following:

1. Go to: https://www.editorialmanager.com/pulmoe/

2. Enter your login details

3. Click [Author Login]
This takes you to the Author Main Menu.

4. Click [Submissions Needing Revision]
I look forward to receiving your revised manuscript.

Yours sincerely,

Nicolino Ambrosino
Editor-in-Chief
Pulmonology

' comments:
1. Include EC approval in the text at beginning of methods.

The Ethics Committe approval had been added at the end of the first paragraph of the methids section.

2. Remove legends of figures from the text and add them at the end of the manuscript, after references

All figure legends had been replaced to the end of the manuscript.

3. Many references are still incorrect (some lack pages, some need abbreviations of journal names, some need additional authors (up to 3 or 6 t al).

All references had been revised: all authors added (up to six names), pages of journals after the number of the edition, and abbreviations of journal name (where necessary).


Reviewer #1: I would like to thank the authors for their responses.
I have no further comments to make.


Reviewer #2: An interesting paper that can be published without further revision.


Reviewer #3: This reviewer feels that the Authors have satisfactorily dealt with his comments and suggests the Editor in Chief to accept the manuscript for publication
on Pulmonology.

The authors would like to thank all reviewers for their thorough work and approval of our manuscript.
